# Supplementary material for: Disease Differentiation and Monitoring of Anti-TNF Treatment in Rheumatoid Arthritis and Spondyloarthropathies
Source: MDPI journal article supplement (doi:10.3390/ijms22147389), 2021-07-09
Supplement: s1 [file s1]

# Disease differentiation and monitoring of anti-TNF treatment in rheumatoid arthritis and spondyloarthropathies

Katarzyna Bogunia-Kubik<sup>1</sup>, Wojciech Wojtowicz<sup>2</sup>, Jerzy Swierkot<sup>3</sup>, Karolina Anna Mielko<sup>2\*</sup>, Badr Qasem<sup>2\*</sup>, Joanna Wielinska<sup>1</sup>, Renata Sokolik<sup>3</sup>, Łukasz Pruss<sup>4</sup>, Piotr Młynarz<sup>2\*</sup>

<sup>1</sup> Laboratory of Clinical Immunogenetics and Pharmacogenetics, Hirsfeld Institute of Immunology and Experimental Therapy, Polish Academy of Sciences, Wrocław, Poland; katarzyna.bogunia-kubik@hirsfeld.pl (K.B.K); joanna.wielinska@hirsfeld.pl (J.W);

<sup>2</sup> Department of Rheumatology and Internal Medicine, Wrocław Medical University, Wrocław, Poland; jerzy.swierkow@umed.wroc.pl (J.S); renata.sokolik@umed.wroc.pl (R.S);

<sup>3</sup> Department of Bioorganic Chemistry, Wrocław University of Technology, Wrocław, Poland; piotr.mlynarz@pwr.edu.pl (P.M); wojciech.wojtowicz@pwr.edu.pl (W.W); badr.qasem@pwr.edu.pl (B.Q); karolina.mielko@pwr.edu.pl (K.M)

<sup>4</sup> Ardigen, Krakow, Poland; lukasz.pruss.1993@gmail.com (L.P)

\* Correspondence: piotr.mlynarz@pwr.edu.pl (P.M); (ORCID: 0000-0002-8502-4022)

## Supplemental material

**Table S1.** Demographic data and clinical profiles of patients treated with TNF inhibitors.

| Patients                                                         | RA         | AS         | PsA                          |
|------------------------------------------------------------------|------------|------------|------------------------------|
| Number of patients; n                                            | 26         | 29         | 23 (20 peripheral + 3 axial) |
| Age, median (range); years                                       | 55 (23-74) | 45 (26-75) | 43 (29-71)                   |
| Sex; females/males                                               | 21/5       | 7/22       | 9/14                         |
| Disease duration, median (range); years                          | 9 (1-56)   | 11 (1-40)  | 8 (2-41)                     |
| Disease onset, median (range); years                             | 43 (4-64)  | 31 (12-45) | 35 (18-56)                   |
| Anti-CCP positive, n (%)                                         | 18 (69%)   | -          | -                            |
| RF positive, n (%)                                               | 20 (77%)   | -          | -                            |
| HLA B27 positive, n (%)                                          | -          | 27 (93%)   | -                            |
| <b>Concomitant treatment at the start of biologic treatment:</b> |            |            |                              |
| MTX, n (%)                                                       | 17 (65%)   | 9 (31%)    | 15 (65%)                     |
| Corticosteroids, n (%)                                           | 14 (54%)   | 5 (17%)    | 2 (9%)                       |
| <b>Treatment (anti TNF drug):</b>                                |            |            |                              |
| Etanercept, n (%)                                                | 14 (54%)   | 11 (38%)   | 8 (35%)                      |
| Golimumab, n (%)                                                 | 3 (11.5%)  | 2 (7%)     | 3 (13%)                      |
| Adalimumab, n (%)                                                | 3 (11.5%)  | 10 (35%)   | 10 (43%)                     |
| Certolizumab, n (%)                                              | 6 (23%)    | 5 (17%)    | 2 (9%)                       |
| Infliximab, n (%)                                                | -          | 1 (3%)     | -                            |

|                                                                                     |                                    |               |                                    |
|-------------------------------------------------------------------------------------|------------------------------------|---------------|------------------------------------|
| <b>Disease activity:</b>                                                            |                                    |               |                                    |
| DAS28 before treatment, mean $\pm$ SD                                               | 6.10 $\pm$ 0.62 (range: 5.12-7.19) | -             | 6.17 $\pm$ 0.94 (range: 4.4-8.3)   |
| DAS28 at 6 months, mean $\pm$ SD                                                    | 2.69 $\pm$ 0.84 (range: 0.84-4.93) | -             | 3.15 $\pm$ 1.44 (range: 1.01-6.06) |
| Remission at 6 months, n (%) (DAS28<2.6)                                            | 9 (35%)                            | -             | 8 (40% of peripheral PsA)          |
| Low disease activity at 6 months, n (%) (2.6 $\leq$ DAS28 $\leq$ 3.2)               | 13 (50%)                           | -             | 4 (20% of peripheral PsA)          |
| BASDAI before treatment, median (range)                                             | -                                  | 8.2 (5.7-10)  | 8 (6-9)                            |
| BASDAI at 6 months, median (range)                                                  | -                                  | 2.15 (0.75-9) | 2 (0-8)                            |
| Remission at 6 months (BASDAI<3), n (%)                                             | -                                  | 26 (90%)      | 3 (100% of 3 axial PsA)            |
| Non-responder at 3 months, n (%)                                                    | 7 (27%)                            | 3 (10%)       | 9 (39%)                            |
| Non-responder at 6 months, n (%)                                                    | 4 (15%)                            | 2 (7%)        | 8 (35%)                            |
| Treatment efficacy after 3 months - responders (good and moderate response), n (%)  | 19 (73%)                           | 26 (90%)      | 14 (61%)                           |
| Treatment efficacy after 6 months - responders (good and moderate response ), n (%) | 22 (85%)                           | 27 (93%)      | 15 (65%)                           |

RA= rheumatoid arthritis, AS= ankylosing spondylitis, PsA= psoriatic arthritis

DAS28 = disease activity score 28; CRP = C-reactive protein; RF = rheumatoid factor; anti-CCP = anti-cyclic citrullinated peptide antibodies; SD = standard deviation; TNF = tumor necrosis factor, MTX= methotrexate; NSAIDs= Nonsteroidal anti-inflammatory drugs

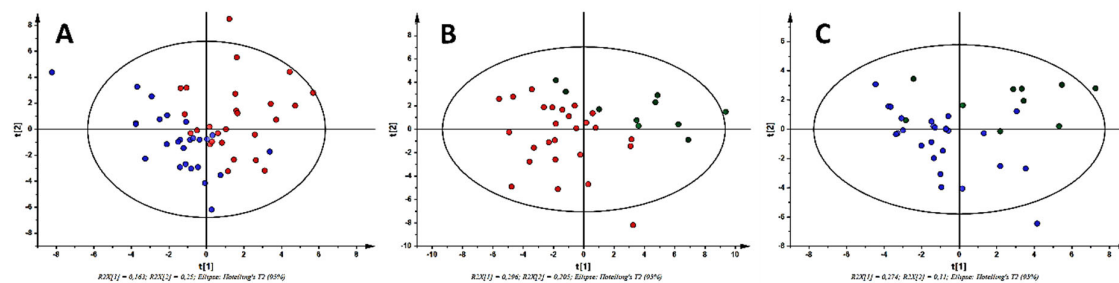

**Figure S1.** PLS-DA model plots for RA treatment at various time points. A – before treatment vs. after 3 months, B – before treatment vs. after 6 months, C – after 3 months vs. after 6 months of therapy with TNFi. Red – RA patients before treatment, Blue – 3 months after initialization of anti-TNF treatment, Green – 6 months after treatment with TNFi.

**Table S2.** The VIP score for discrimination PLS with univariate analysis results for quantified metabolites in comparisons for RA patients.

| Rheumatoid arthritis   |                            |          |          |                           |          |          |                |          |          |                         |          |          |
|------------------------|----------------------------|----------|----------|---------------------------|----------|----------|----------------|----------|----------|-------------------------|----------|----------|
| Metabolite             | VIP score for PLS-DA model |          |          | Percentage difference [%] |          |          | <i>p</i> value |          |          | Adjusted <i>p</i> value |          |          |
|                        | BT vs 3M                   | BT vs 6M | 3M vs 6M | BT vs 3M                  | BT vs 6M | 3M vs 6M | BT vs 3M       | BT vs 6M | 3M vs 6M | BT vs 3M                | BT vs 6M | 3M vs 6M |
| 2-Hydroxybutyrate      | 0.923                      | 1.142    | 0.523    | -9.98                     | 3.16     | 13.13    | 3.95E-01       | 9.03E-01 | 1.13E-01 | 6.27E-01                | 9.03E-01 | 4.77E-01 |
| 2-Oxoisocaproate       | 1.165                      | 1.239    | 0.898    | 16.07                     | 30.10    | 14.21    | 2.86E-02       | 8.24E-04 | 1.16E-01 | 1.36E-01                | 8.57E-03 | 4.77E-01 |
| 3-Hydroxybutyrate      | 0.574                      | 0.958    | 0.263    | -27.70                    | -50.73   | -23.86   | 4.32E-01       | 6.05E-02 | 9.94E-01 | 6.27E-01                | 1.42E-01 | 9.94E-01 |
| 3-Methyl-2-oxovalerate | 0.996                      | 1.198    | 0.905    | 16.21                     | 37.25    | 21.37    | 2.05E-01       | 2.46E-03 | 1.16E-01 | 4.63E-01                | 1.53E-02 | 4.77E-01 |
| Acetate                | 0.969                      | 0.879    | 1.427    | -18.72                    | -30.55   | -12.01   | 7.37E-02       | 4.79E-03 | 4.49E-02 | 2.56E-01                | 2.49E-02 | 4.67E-01 |
| Acetone                | 0.640                      | 0.917    | 0.652    | 1.43                      | 9.81     | 8.38     | 4.34E-01       | 2.86E-01 | 2.26E-01 | 6.27E-01                | 3.91E-01 | 5.68E-01 |
| Alanine                | 1.643                      | 1.448    | 0.919    | 26.23                     | 35.02    | 9.00     | 1.27E-05       | 2.58E-04 | 5.06E-01 | 3.31E-04                | 6.70E-03 | 6.80E-01 |
| Choline                | 1.284                      | 1.545    | 1.353    | -14.61                    | 8.29     | 22.84    | 1.18E-01       | 4.34E-01 | 1.19E-01 | 2.94E-01                | 5.25E-01 | 4.77E-01 |
| Citrate                | 0.470                      | 0.548    | 0.564    | 5.71                      | 12.44    | 6.74     | 4.03E-01       | 4.21E-01 | 2.50E-01 | 6.27E-01                | 5.21E-01 | 5.68E-01 |
| Creatine               | 0.530                      | 0.887    | 1.287    | 1.05                      | 32.69    | 31.67    | 5.27E-01       | 1.35E-02 | 7.37E-03 | 7.05E-01                | 5.41E-02 | 2.11E-01 |
| Creatinine             | 0.708                      | 1.148    | 0.903    | 3.01                      | 11.52    | 8.51     | 2.62E-01       | 8.40E-02 | 2.70E-01 | 5.05E-01                | 1.62E-01 | 5.68E-01 |
| Ethanol                | 2.603                      | 1.980    | 1.097    | -68.73                    | -80.27   | -13.39   | 5.28E-07       | 1.00E-04 | 2.65E-01 | 2.75E-05                | 5.20E-03 | 5.68E-01 |
| Formate                | 0.659                      | 0.275    | 1.705    | 14.33                     | -2.32    | -16.63   | 2.78E-01       | 8.89E-01 | 8.99E-02 | 5.16E-01                | 9.03E-01 | 4.77E-01 |
| Glucose                | 0.503                      | 0.557    | 0.296    | 7.72                      | 4.19     | -3.53    | 2.58E-01       | 4.79E-01 | 9.88E-01 | 5.05E-01                | 5.66E-01 | 9.94E-01 |
| Glutamate              | 0.495                      | 0.645    | 1.538    | 2.59                      | -6.14    | -8.73    | 7.61E-01       | 5.69E-01 | 4.30E-01 | 8.25E-01                | 6.30E-01 | 6.57E-01 |
| Glutamine              | 1.370                      | 1.213    | 0.830    | 14.34                     | 22.63    | 8.37     | 2.48E-03       | 2.65E-03 | 2.32E-01 | 4.29E-02                | 1.53E-02 | 5.68E-01 |
| Glycerol               | 0.656                      | 0.619    | 0.745    | -6.90                     | -2.58    | 4.32     | 3.05E-01       | 4.16E-01 | 4.52E-01 | 5.47E-01                | 5.21E-01 | 6.71E-01 |
| Glycine                | 0.835                      | 0.807    | 0.748    | 10.16                     | 8.72     | -1.44    | 2.22E-02       | 7.38E-02 | 5.10E-01 | 1.33E-01                | 1.48E-01 | 6.80E-01 |
| Histidine              | 1.121                      | 1.019    | 0.863    | 8.88                      | 17.55    | 8.71     | 8.14E-02       | 5.33E-02 | 3.33E-01 | 2.65E-01                | 1.39E-01 | 6.48E-01 |
| Isobutyrate            | 1.651                      | 1.105    | 1.168    | -37.59                    | -65.21   | -29.42   | 6.82E-02       | 4.63E-02 | 3.86E-01 | 2.56E-01                | 1.27E-01 | 6.48E-01 |
| Isoleucine             | 1.003                      | 0.810    | 1.112    | 10.28                     | 25.64    | 15.46    | 1.19E-01       | 1.15E-01 | 3.99E-01 | 2.94E-01                | 1.87E-01 | 6.48E-01 |
| Lactate                | 0.872                      | 0.853    | 0.968    | 19.75                     | 18.67    | -1.09    | 9.45E-02       | 6.79E-03 | 7.21E-01 | 2.79E-01                | 3.21E-02 | 7.81E-01 |
| Leucine                | 0.787                      | 0.876    | 1.128    | 6.31                      | 17.32    | 11.04    | 2.23E-01       | 9.36E-02 | 3.69E-01 | 4.84E-01                | 1.68E-01 | 6.48E-01 |
| Lysine                 | 0.723                      | 0.981    | 1.432    | 0.79                      | 21.44    | 20.66    | 6.41E-01       | 2.96E-02 | 4.25E-02 | 7.57E-01                | 9.05E-02 | 4.67E-01 |
| Lysine + Leucine       | 0.723                      | 0.939    | 1.091    | -0.40                     | 13.15    | 13.55    | 9.76E-01       | 1.78E-01 | 3.69E-01 | 9.76E-01                | 2.64E-01 | 6.48E-01 |
| NAC (2.092 ppm) (s)    | 0.787                      | 0.691    | 1.110    | 1.86                      | 4.27     | 2.41     | 4.34E-01       | 2.95E-01 | 6.26E-01 | 6.27E-01                | 3.93E-01 | 7.40E-01 |
| O-Phosphocholine       | 0.856                      | 1.193    | 0.559    | -5.28                     | 3.26     | 8.53     | 5.42E-01       | 6.80E-02 | 5.82E-01 | 7.05E-01                | 1.46E-01 | 7.29E-01 |
| Phenylealanine         | 0.683                      | 0.715    | 1.005    | 2.92                      | 15.07    | 12.16    | 6.73E-01       | 1.04E-01 | 3.42E-01 | 7.57E-01                | 1.74E-01 | 6.48E-01 |
| Proline                | 0.981                      | 0.907    | 1.144    | 14.74                     | 19.33    | 4.62     | 7.36E-02       | 1.53E-01 | 7.90E-01 | 2.56E-01                | 2.34E-01 | 8.38E-01 |
| Propylene glycol       | 1.234                      | 1.135    | 0.844    | 22.41                     | 45.86    | 24.07    | 1.22E-01       | 4.08E-04 | 1.18E-01 | 2.94E-01                | 7.07E-03 | 4.77E-01 |
| Pyruvate               | 1.105                      | 0.993    | 0.964    | 58.44                     | 40.04    | -19.54   | 5.94E-02       | 9.06E-02 | 6.80E-01 | 2.56E-01                | 1.68E-01 | 7.68E-01 |
| sn-G3P                 | 0.680                      | 0.942    | 0.615    | 5.34                      | 12.90    | 7.57     | 1.24E-01       | 9.67E-02 | 3.93E-01 | 2.94E-01                | 1.68E-01 | 6.48E-01 |
| Succinate + 3HB        | 0.535                      | 1.076    | 0.505    | -1.76                     | -6.28    | -4.52    | 8.65E-01       | 3.65E-01 | 6.56E-01 | 8.82E-01                | 4.74E-01 | 7.58E-01 |
| Taurine                | 1.107                      | 1.019    | 0.732    | 10.95                     | 21.15    | 10.26    | 2.15E-02       | 2.76E-02 | 2.43E-01 | 1.33E-01                | 8.96E-02 | 5.68E-01 |
| Tryptophan             | 0.711                      | 1.160    | 1.381    | 10.44                     | 31.09    | 20.82    | 2.57E-01       | 7.22E-04 | 1.00E-01 | 5.05E-01                | 8.57E-03 | 4.77E-01 |
| Tyrosine               | 1.153                      | 1.304    | 0.968    | 14.32                     | 30.04    | 15.89    | 2.06E-02       | 2.25E-03 | 2.56E-01 | 1.33E-01                | 1.53E-02 | 5.68E-01 |
| Unk 4 (1.074 ppm) (s)  | 1.121                      | 0.571    | 0.846    | 2.39                      | 10.37    | 7.98     | 5.59E-01       | 5.15E-01 | 6.17E-01 | 7.09E-01                | 5.90E-01 | 7.40E-01 |
| Unk 6 (1.23 ppm) (m)   | 0.807                      | 0.814    | 0.728    | -7.81                     | 1.98     | 9.78     | 6.21E-01       | 5.22E-01 | 5.72E-01 | 7.51E-01                | 5.90E-01 | 7.29E-01 |
| Unk_10 (2.769 ppm) (s) | 1.505                      | 1.125    | 0.882    | -66.95                    | -38.54   | 30.36    | 2.31E-02       | 6.26E-02 | 1.13E-01 | 1.33E-01                | 1.42E-01 | 4.77E-01 |

|                        |       |       |       |        |        |        |          |          |          |          |          |          |
|------------------------|-------|-------|-------|--------|--------|--------|----------|----------|----------|----------|----------|----------|
| Unk_11 (2.945 ppm) (s) | 0.832 | 1.149 | 1.377 | -3.69  | 22.31  | 25.95  | 8.45E-01 | 7.01E-02 | 1.18E-02 | 8.79E-01 | 1.46E-01 | 2.11E-01 |
| Unk_12 (3.051 ppm) (s) | 0.409 | 0.884 | 0.415 | 11.65  | 34.56  | 23.14  | 4.84E-01 | 1.25E-02 | 1.38E-01 | 6.81E-01 | 5.41E-02 | 5.11E-01 |
| Unk_13 (3.112 ppm) (s) | 0.341 | 0.859 | 0.713 | 13.17  | 49.32  | 36.75  | 5.31E-01 | 2.47E-01 | 2.73E-01 | 7.05E-01 | 3.48E-01 | 5.68E-01 |
| Unk_14 (3.246 ppm) (s) | 0.568 | 0.631 | 0.646 | -2.53  | 1.73   | 4.26   | 5.90E-01 | 8.60E-01 | 7.04E-01 | 7.30E-01 | 8.94E-01 | 7.79E-01 |
| Unk_15 (3.63 ppm) (s)  | 0.738 | 0.965 | 1.301 | 4.24   | 19.31  | 15.11  | 3.23E-01 | 5.75E-02 | 1.22E-02 | 5.60E-01 | 1.42E-01 | 2.11E-01 |
| Unk_16 (7.334 ppm) (t) | 0.720 | 1.021 | 1.098 | 1.79   | 17.02  | 15.24  | 8.03E-01 | 2.36E-02 | 1.75E-01 | 8.52E-01 | 8.18E-02 | 5.68E-01 |
| Unk_18 (8.238 ppm) (s) | 0.744 | 0.593 | 0.770 | 15.94  | 2.18   | -13.77 | 3.36E-01 | 6.84E-01 | 4.16E-01 | 5.64E-01 | 7.28E-01 | 6.56E-01 |
| Unk_2 (0.914 ppm) (d)  | 1.443 | 1.082 | 0.515 | -30.80 | -28.14 | 2.72   | 4.41E-03 | 1.33E-01 | 5.89E-01 | 5.73E-02 | 2.09E-01 | 7.29E-01 |
| Unk_3 (0.967 ppm) (s)  | 0.808 | 0.770 | 0.885 | 1.82   | 16.96  | 15.15  | 6.84E-01 | 3.85E-02 | 2.41E-01 | 7.57E-01 | 1.11E-01 | 5.68E-01 |
| Unk_7 (1.444 ppm) (d)  | 1.172 | 0.866 | 1.237 | 23.78  | 25.44  | 1.69   | 1.11E-02 | 1.16E-03 | 9.35E-01 | 1.15E-01 | 1.00E-02 | 9.72E-01 |
| Unk_8 (2.050 ppm) (m)  | 0.802 | 1.047 | 1.559 | -2.77  | -5.94  | -3.17  | 6.74E-01 | 6.86E-01 | 4.93E-01 | 7.57E-01 | 7.28E-01 | 6.80E-01 |
| Unk_9 (2.743 ppm) (s)  | 1.259 | 0.923 | 0.796 | -21.82 | -20.18 | 1.66   | 9.65E-02 | 1.88E-01 | 5.00E-01 | 2.79E-01 | 2.72E-01 | 6.80E-01 |
| Valine                 | 0.941 | 0.953 | 1.130 | 8.63   | 23.34  | 14.79  | 2.87E-02 | 1.86E-02 | 1.51E-01 | 1.36E-01 | 6.89E-02 | 5.22E-01 |

Grey – Metabolites above VIP 1.00,  $p$  value <0.05, adjusted  $p$  value <0.05

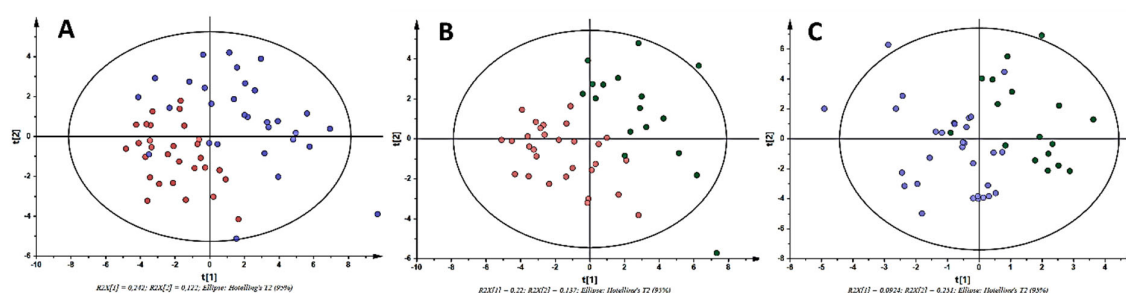

**Figure S2.** PLS-DA model plots for AS treatment at various time points. A – before treatment vs. after 3 months, B – before treatment vs. after 6 months, C – after 3 months vs. after 6 months of therapy with TNFi. Red – AS patients before treatment, Blue – 3 months after initialization of anti-TNF treatment, Green – 6 months after treatment with TNFi.

**Table S3.** The VIP score for discrimination PLS with univariate analysis results for quantified metabolites in comparisons for AS patients.

| Ankylosing spondylitis |                            |          |          |                           |          |          |           |          |          |                    |          |          |
|------------------------|----------------------------|----------|----------|---------------------------|----------|----------|-----------|----------|----------|--------------------|----------|----------|
| Metabolite             | VIP score for PLS-DA model |          |          | Percentage difference [%] |          |          | $p$ value |          |          | Adjusted $p$ value |          |          |
|                        | BT vs 3M                   | BT vs 6M | 3M vs 6M | BT vs 3M                  | BT vs 6M | 3M vs 6M | BT vs 3M  | BT vs 6M | 3M vs 6M | BT vs 3M           | BT vs 6M | 3M vs 6M |
| 2-Hydroxybutyrate      | 0.752                      | 0.728    | 0.478    | -1.32                     | -7.26    | -5.94    | 8.39E-01  | 2.18E-01 | 6.79E-01 | 8.77E-01           | 3.00E-01 | 9.85E-01 |
| 2-Oxoisocaproate       | 1.210                      | 1.291    | 0.783    | 32.06                     | 38.28    | 6.42     | 1.19E-05  | 1.22E-02 | 4.28E-01 | 1.54E-04           | 5.76E-02 | 9.64E-01 |
| 3-Hydroxybutyrate      | 0.448                      | 0.748    | 0.429    | -2.41                     | -4.51    | -2.10    | 6.46E-01  | 6.89E-01 | 9.52E-01 | 7.31E-01           | 7.46E-01 | 9.85E-01 |
| 3-Methyl-2-oxovalerate | 1.125                      | 1.151    | 0.330    | 36.66                     | 35.26    | -1.45    | 5.76E-04  | 3.99E-02 | 9.85E-01 | 2.99E-03           | 9.82E-02 | 9.85E-01 |
| Acetate                | 0.469                      | 0.935    | 1.859    | -2.64                     | -20.17   | -17.55   | 5.37E-01  | 1.12E-02 | 3.52E-02 | 6.35E-01           | 5.76E-02 | 3.17E-01 |
| Acetone                | 1.532                      | 0.902    | 0.995    | -12.87                    | -9.73    | 3.14     | 2.24E-02  | 1.90E-01 | 5.10E-01 | 4.66E-02           | 2.82E-01 | 9.82E-01 |
| Alanine                | 0.952                      | 0.927    | 0.309    | 15.89                     | 14.42    | -1.48    | 1.11E-04  | 2.42E-02 | 9.80E-01 | 8.22E-04           | 7.48E-02 | 9.85E-01 |

|                        |       |       |       |        |        |        |          |          |          |          |          |          |
|------------------------|-------|-------|-------|--------|--------|--------|----------|----------|----------|----------|----------|----------|
| Choline                | 0.915 | 0.565 | 1.898 | -17.00 | 9.85   | 26.74  | 8.22E-02 | 1.60E-01 | 9.33E-02 | 1.26E-01 | 2.52E-01 | 4.86E-01 |
| Citrate                | 1.460 | 0.858 | 1.406 | 36.08  | 19.67  | -16.71 | 8.55E-07 | 3.39E-02 | 8.25E-02 | 4.44E-05 | 9.26E-02 | 4.86E-01 |
| Creatine               | 1.018 | 1.094 | 0.592 | 19.54  | 26.35  | 6.90   | 2.41E-05 | 8.02E-03 | 3.56E-01 | 2.39E-04 | 5.76E-02 | 9.64E-01 |
| Creatinine             | 0.895 | 0.859 | 0.516 | 11.87  | 11.62  | -0.26  | 5.44E-04 | 2.82E-02 | 9.64E-01 | 2.99E-03 | 8.16E-02 | 9.85E-01 |
| Ethanol                | 2.288 | 2.496 | 0.381 | -31.22 | -30.42 | 0.82   | 4.73E-06 | 1.00E-04 | 9.73E-01 | 8.19E-05 | 4.12E-03 | 9.85E-01 |
| Formate                | 1.166 | 0.969 | 0.267 | 28.30  | 24.75  | -3.62  | 8.69E-03 | 1.32E-01 | 3.61E-01 | 2.38E-02 | 2.21E-01 | 9.64E-01 |
| Glucose                | 0.488 | 0.946 | 0.583 | 1.24   | 1.89   | 0.66   | 6.78E-01 | 9.09E-01 | 7.78E-01 | 7.50E-01 | 9.27E-01 | 9.85E-01 |
| Glutamate              | 0.678 | 0.818 | 0.701 | 3.03   | 6.69   | 3.66   | 4.64E-01 | 6.62E-01 | 4.43E-01 | 5.74E-01 | 7.36E-01 | 9.64E-01 |
| Glutamine              | 1.247 | 0.961 | 0.932 | 17.87  | 12.55  | -5.35  | 1.78E-06 | 1.89E-01 | 4.21E-02 | 4.62E-05 | 2.82E-01 | 3.17E-01 |
| Glycerol               | 0.495 | 0.375 | 0.392 | 8.55   | 4.28   | -4.27  | 1.83E-02 | 4.74E-01 | 3.83E-01 | 3.96E-02 | 5.74E-01 | 9.64E-01 |
| Glycine                | 0.845 | 0.510 | 0.707 | 11.61  | 6.02   | -5.60  | 5.78E-03 | 2.16E-01 | 2.85E-01 | 1.77E-02 | 3.00E-01 | 9.27E-01 |
| Histidine              | 1.054 | 1.094 | 0.153 | 16.77  | 15.59  | -1.18  | 2.76E-05 | 1.39E-02 | 9.68E-01 | 2.39E-04 | 5.91E-02 | 9.85E-01 |
| Isobutyrate            | 0.795 | 1.223 | 2.901 | -10.88 | -89.48 | -80.56 | 4.23E-01 | 7.39E-04 | 1.00E-04 | 5.36E-01 | 7.97E-03 | 5.20E-03 |
| Isoleucine             | 0.855 | 0.859 | 0.827 | 13.07  | 4.47   | -8.61  | 4.75E-02 | 5.37E-01 | 5.04E-01 | 7.96E-02 | 6.21E-01 | 9.82E-01 |
| Lactate                | 0.895 | 1.301 | 1.101 | 16.88  | 31.58  | 14.91  | 5.32E-03 | 1.11E-02 | 2.51E-01 | 1.73E-02 | 5.76E-02 | 8.70E-01 |
| Leucine                | 1.012 | 0.997 | 0.592 | 12.85  | 13.49  | 0.65   | 1.15E-02 | 1.19E-02 | 6.86E-01 | 2.86E-02 | 5.76E-02 | 9.85E-01 |
| Lysine                 | 0.788 | 0.740 | 0.723 | 10.85  | 7.35   | -3.50  | 3.46E-02 | 1.39E-01 | 8.17E-01 | 6.20E-02 | 2.26E-01 | 9.85E-01 |
| Lysine + Leucine       | 0.822 | 0.792 | 0.693 | 5.21   | 3.13   | -2.07  | 2.70E-01 | 4.40E-01 | 9.17E-01 | 3.70E-01 | 5.72E-01 | 9.85E-01 |
| NAC (2.092 ppm) (s)    | 1.045 | 0.941 | 0.539 | 0.79   | 0.63   | -0.16  | 6.21E-01 | 8.74E-01 | 9.67E-01 | 7.17E-01 | 9.09E-01 | 9.85E-01 |
| O-Phosphocholine       | 0.607 | 0.603 | 0.701 | -0.71  | 6.52   | 7.22   | 9.58E-01 | 9.69E-01 | 5.88E-01 | 9.58E-01 | 9.69E-01 | 9.85E-01 |
| Phenylealanine         | 0.868 | 1.269 | 1.393 | 11.61  | 20.89  | 9.34   | 5.26E-02 | 7.66E-04 | 1.44E-01 | 8.54E-02 | 7.97E-03 | 6.25E-01 |
| Proline                | 1.032 | 0.805 | 0.550 | 10.95  | 9.42   | -1.54  | 2.78E-02 | 2.19E-01 | 9.31E-01 | 5.15E-02 | 3.00E-01 | 9.85E-01 |
| Propylene glycol       | 1.177 | 1.183 | 1.489 | 29.49  | 51.72  | 23.11  | 1.03E-02 | 4.94E-02 | 1.73E-01 | 2.67E-02 | 1.10E-01 | 6.91E-01 |
| Pyruvate               | 1.045 | 1.166 | 0.909 | 40.83  | 75.20  | 37.23  | 9.40E-02 | 5.08E-02 | 4.55E-01 | 1.40E-01 | 1.10E-01 | 9.64E-01 |
| sn-G3P                 | 1.414 | 1.115 | 1.788 | 21.17  | 7.39   | -13.83 | 5.20E-04 | 2.51E-01 | 1.11E-02 | 2.99E-03 | 3.35E-01 | 2.89E-01 |
| Succinate + 3HB        | 0.856 | 0.806 | 0.750 | 11.32  | 5.75   | -5.58  | 6.95E-02 | 4.86E-01 | 3.40E-01 | 1.10E-01 | 5.75E-01 | 9.64E-01 |
| Taurine                | 0.921 | 0.870 | 0.465 | 9.71   | 14.75  | 5.06   | 2.58E-02 | 8.89E-02 | 6.10E-01 | 4.97E-02 | 1.65E-01 | 9.85E-01 |
| Tryptophan             | 1.082 | 1.107 | 0.363 | 20.16  | 23.81  | 3.69   | 2.95E-03 | 1.55E-02 | 5.94E-01 | 1.02E-02 | 5.91E-02 | 9.85E-01 |
| Tyrosine               | 0.825 | 1.135 | 0.511 | 13.63  | 17.82  | 4.22   | 6.76E-03 | 1.59E-02 | 5.84E-01 | 1.95E-02 | 5.91E-02 | 9.85E-01 |
| Valine                 | 0.958 | 0.977 | 0.591 | 12.39  | 12.64  | 0.25   | 1.43E-02 | 4.15E-02 | 6.89E-01 | 3.24E-02 | 9.82E-02 | 9.85E-01 |
| Unk_4 (1.074 ppm) (s)  | 0.666 | 0.684 | 0.668 | 7.11   | -0.82  | -7.93  | 5.12E-01 | 7.36E-01 | 7.24E-01 | 6.19E-01 | 7.81E-01 | 9.85E-01 |
| Unk_6 (1.23 ppm) (m)   | 0.653 | 0.634 | 1.088 | 0.16   | 15.43  | 15.27  | 9.53E-01 | 9.87E-02 | 1.04E-01 | 9.58E-01 | 1.71E-01 | 4.94E-01 |
| Unk_10 (2.769 ppm) (s) | 0.881 | 1.052 | 1.525 | -55.25 | -86.99 | -36.07 | 1.40E-02 | 2.16E-03 | 2.66E-02 | 3.24E-02 | 1.87E-02 | 3.17E-01 |
| Unk_11 (2.945 ppm) (s) | 1.134 | 1.165 | 0.538 | 29.84  | 27.28  | -2.61  | 9.09E-04 | 1.59E-04 | 5.91E-01 | 3.84E-03 | 4.12E-03 | 9.85E-01 |
| Unk_12 (3.051 ppm) (s) | 0.659 | 0.806 | 0.165 | 20.81  | 24.36  | 3.59   | 7.07E-04 | 2.42E-02 | 4.64E-01 | 3.34E-03 | 7.48E-02 | 9.64E-01 |
| Unk_13 (3.112 ppm) (s) | 0.748 | 0.645 | 0.290 | 31.63  | 30.01  | -1.66  | 1.67E-01 | 4.68E-01 | 9.22E-01 | 2.34E-01 | 5.74E-01 | 9.85E-01 |
| Unk_14 (3.246 ppm) (s) | 0.692 | 1.042 | 1.814 | 4.01   | -13.19 | -17.18 | 3.65E-01 | 5.28E-02 | 3.71E-02 | 4.75E-01 | 1.10E-01 | 3.17E-01 |
| Unk_15 (3.63 ppm) (s)  | 1.232 | 0.974 | 0.934 | 14.22  | 9.43   | -4.80  | 9.61E-04 | 2.44E-02 | 2.24E-01 | 3.84E-03 | 7.48E-02 | 8.31E-01 |
| Unk_16 (7.334 ppm) (t) | 0.737 | 0.780 | 0.923 | 5.14   | 8.41   | 3.27   | 2.80E-01 | 6.71E-02 | 4.33E-01 | 3.73E-01 | 1.29E-01 | 9.64E-01 |
| Unk_18 (8.238 ppm) (s) | 0.359 | 0.340 | 0.546 | 0.59   | 10.12  | 9.54   | 8.43E-01 | 4.57E-01 | 9.09E-01 | 8.77E-01 | 5.74E-01 | 9.85E-01 |
| Unk_2 (0.914 ppm) (d)  | 1.174 | 1.345 | 1.479 | -28.50 | -56.70 | -29.39 | 2.57E-03 | 3.50E-04 | 9.34E-02 | 9.56E-03 | 6.06E-03 | 4.86E-01 |
| Unk_3 (0.967 ppm) (s)  | 0.743 | 0.659 | 0.683 | 8.32   | 5.19   | -3.14  | 1.60E-01 | 6.65E-01 | 9.19E-01 | 2.30E-01 | 7.36E-01 | 9.85E-01 |
| Unk_7 (1.444 ppm) (d)  | 1.090 | 1.032 | 0.324 | 15.65  | 18.41  | 2.78   | 4.46E-02 | 6.49E-02 | 6.64E-01 | 7.73E-02 | 1.29E-01 | 9.85E-01 |

|                       |       |       |       |        |        |        |          |          |          |          |          |          |
|-----------------------|-------|-------|-------|--------|--------|--------|----------|----------|----------|----------|----------|----------|
| Unk_8 (2.050 ppm) (m) | 1.619 | 1.039 | 0.713 | -12.17 | -10.84 | 1.34   | 2.33E-02 | 9.78E-02 | 7.84E-01 | 4.66E-02 | 1.71E-01 | 9.85E-01 |
| Unk_9 (2.743 ppm) (s) | 0.620 | 1.051 | 1.466 | 3.43   | -19.68 | -23.07 | 7.47E-01 | 3.65E-02 | 4.27E-02 | 8.09E-01 | 9.48E-02 | 3.17E-01 |

Grey – Metabolites above VIP 1.00,  $p$  value <0.05, adjusted  $p$  value <0.05

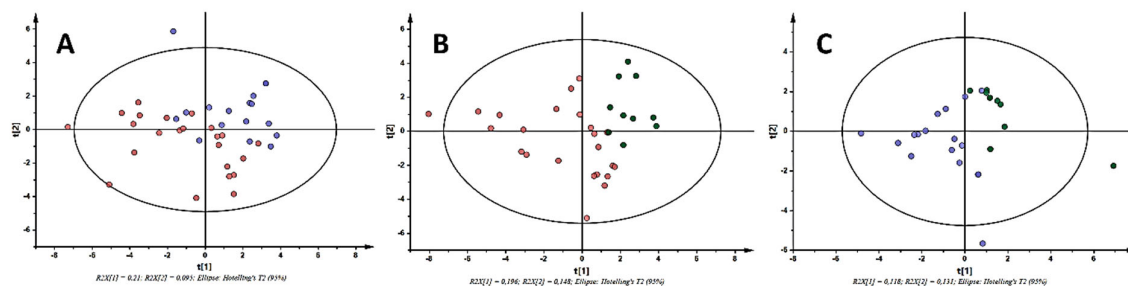

**Figure S3.** PLS-DA model plots for PsA treatment at various time points. A – before treatment vs. after 3 months, B – before treatment vs. after 6 months, C – after 3 months vs. after 6 months of therapy with TNFi. Red – PsA patients before treatment, Blue – 3 months after initialization of anti-TNF treatment, Green – 6 months after treatment with TNFi.

**Table S4.** The VIP score for discrimination PLS with univariate analysis results for quantified metabolites in comparisons for PsA group.

| Metabolite             | VIP score for PLS-DA model |          |          | Percentage difference [%] |          |          | $p$ value |          |          | Adjusted $p$ value |          |          |
|------------------------|----------------------------|----------|----------|---------------------------|----------|----------|-----------|----------|----------|--------------------|----------|----------|
|                        | BT vs 3M                   | BT vs 6M | 3M vs 6M | BT vs 3M                  | BT vs 6M | 3M vs 6M | BT vs 3M  | BT vs 6M | 3M vs 6M | BT vs 3M           | BT vs 6M | 3M vs 6M |
| 2-Hydroxybutyrate      | 0.903                      | 0.744    | 0.452    | -19.13                    | -24.93   | -5.87    | 3.07E-01  | 2.43E-01 | 7.64E-01 | 7.25E-01           | 5.41E-01 | 9.26E-01 |
| 2-Oxoisocaproate       | 0.145                      | 0.892    | 1.384    | -3.59                     | 19.97    | 23.52    | 4.48E-01  | 1.49E-01 | 6.37E-02 | 8.31E-01           | 4.83E-01 | 6.62E-01 |
| 3-Hydroxybutyrate      | 0.458                      | 0.365    | 0.322    | -33.14                    | -14.14   | 19.23    | 9.96E-01  | 9.15E-01 | 6.75E-01 | 9.96E-01           | 9.66E-01 | 9.26E-01 |
| 3-Methyl-2-oxovalerate | 0.362                      | 0.427    | 0.653    | 7.67                      | 14.14    | 6.49     | 8.21E-01  | 6.26E-01 | 6.03E-01 | 9.27E-01           | 8.26E-01 | 9.26E-01 |
| Acetate                | 0.833                      | 1.619    | 1.613    | -13.75                    | -44.14   | -30.85   | 1.55E-02  | 2.70E-04 | 3.65E-02 | 1.61E-01           | 7.49E-03 | 6.32E-01 |
| Acetone                | 1.016                      | 1.664    | 0.899    | -9.74                     | -17.44   | -7.73    | 1.04E-01  | 5.80E-03 | 4.03E-01 | 4.50E-01           | 6.03E-02 | 9.15E-01 |
| Alanine                | 1.042                      | 0.668    | 0.537    | -4.83                     | 0.36     | 5.19     | 6.43E-01  | 5.83E-01 | 4.66E-01 | 9.07E-01           | 8.19E-01 | 9.15E-01 |
| Choline                | 0.857                      | 1.051    | 0.595    | -6.32                     | -11.49   | -5.18    | 3.97E-01  | 2.00E-01 | 6.14E-01 | 8.25E-01           | 5.32E-01 | 9.26E-01 |
| Citrate                | 0.553                      | 1.437    | 1.453    | -6.36                     | 27.87    | 34.08    | 4.96E-01  | 1.38E-01 | 1.44E-01 | 8.46E-01           | 4.78E-01 | 8.12E-01 |
| Creatine               | 0.515                      | 0.800    | 1.250    | -1.84                     | -14.43   | -12.60   | 9.63E-01  | 2.01E-01 | 4.05E-01 | 9.82E-01           | 5.32E-01 | 9.15E-01 |
| Creatinine             | 1.152                      | 0.901    | 0.379    | 1.71                      | 3.43     | 1.72     | 5.04E-01  | 3.49E-01 | 7.10E-01 | 8.46E-01           | 6.25E-01 | 9.26E-01 |
| Ethanol                | 3.287                      | 2.410    | 0.444    | -50.49                    | -48.67   | 1.94     | 1.00E-04  | 9.27E-04 | 7.86E-01 | 5.20E-03           | 1.61E-02 | 9.26E-01 |
| Formate                | 0.380                      | 1.178    | 2.162    | -3.31                     | -11.76   | -8.46    | 2.43E-01  | 3.92E-01 | 4.75E-01 | 6.32E-01           | 6.57E-01 | 9.15E-01 |
| Glucose                | 1.027                      | 0.197    | 1.430    | -16.53                    | 3.70     | 20.20    | 1.93E-01  | 5.01E-01 | 1.43E-01 | 6.30E-01           | 7.23E-01 | 8.12E-01 |
| Glutamate              | 1.059                      | 0.672    | 0.731    | -19.32                    | -9.67    | 9.69     | 3.50E-02  | 2.45E-01 | 3.68E-01 | 2.40E-01           | 5.41E-01 | 9.15E-01 |
| Glutamine              | 0.591                      | 0.670    | 1.174    | -0.78                     | 9.11     | 9.89     | 4.32E-01  | 4.51E-01 | 2.45E-01 | 8.31E-01           | 6.90E-01 | 9.15E-01 |
| Glycerol               | 1.770                      | 0.860    | 0.904    | -19.54                    | -12.12   | 7.47     | 1.19E-02  | 2.15E-01 | 4.29E-01 | 1.55E-01           | 5.32E-01 | 9.15E-01 |
| Glycine                | 0.676                      | 0.136    | 0.645    | -5.57                     | -0.40    | 5.17     | 2.36E-01  | 8.90E-01 | 3.29E-01 | 6.32E-01           | 9.66E-01 | 9.15E-01 |
| Histidine              | 0.882                      | 1.256    | 0.925    | -2.70                     | 3.33     | 6.03     | 5.56E-01  | 7.70E-01 | 2.57E-01 | 9.04E-01           | 9.48E-01 | 9.15E-01 |
| Isobutyrate            | 1.064                      | 1.272    | 1.700    | -2.21                     | -61.23   | -59.22   | 7.08E-02  | 1.67E-02 | 1.14E-03 | 3.35E-01           | 1.24E-01 | 5.93E-02 |

|                        |       |       |       |        |        |        |          |          |          |          |          |          |
|------------------------|-------|-------|-------|--------|--------|--------|----------|----------|----------|----------|----------|----------|
| Isoleucine             | 0.941 | 0.924 | 1.167 | -0.76  | -15.92 | -15.16 | 8.69E-01 | 3.66E-02 | 3.00E-01 | 9.27E-01 | 1.90E-01 | 9.15E-01 |
| Lactate                | 0.959 | 0.094 | 0.630 | 2.41   | 0.11   | -2.29  | 6.86E-01 | 6.51E-01 | 7.64E-01 | 9.07E-01 | 8.26E-01 | 9.26E-01 |
| Leucine                | 0.981 | 1.015 | 0.533 | -4.54  | -4.67  | -0.13  | 7.29E-01 | 7.91E-01 | 9.95E-01 | 9.25E-01 | 9.48E-01 | 9.95E-01 |
| Lysine                 | 1.106 | 1.084 | 0.547 | -7.41  | -12.76 | -5.37  | 2.18E-01 | 7.08E-02 | 5.81E-01 | 6.30E-01 | 3.07E-01 | 9.26E-01 |
| Lysine + Leucine       | 1.130 | 1.085 | 0.481 | -11.00 | -12.79 | -1.79  | 1.57E-01 | 1.14E-01 | 7.94E-01 | 6.26E-01 | 4.36E-01 | 9.26E-01 |
| NAC (2.092 ppm) (s)    | 1.306 | 1.283 | 0.538 | -6.05  | -6.74  | -0.69  | 3.19E-02 | 2.12E-02 | 9.75E-01 | 2.40E-01 | 1.38E-01 | 9.94E-01 |
| O-Phosphocholine       | 0.738 | 0.809 | 0.581 | -2.13  | -10.04 | -7.92  | 6.90E-01 | 2.12E-01 | 4.09E-01 | 9.07E-01 | 5.32E-01 | 9.15E-01 |
| Phenylealanine         | 0.845 | 0.586 | 1.141 | -8.48  | 1.23   | 9.71   | 2.09E-01 | 8.02E-01 | 2.60E-01 | 6.30E-01 | 9.48E-01 | 9.15E-01 |
| Proline                | 1.119 | 0.450 | 1.164 | -15.81 | -3.20  | 12.62  | 4.15E-02 | 9.39E-01 | 1.56E-01 | 2.40E-01 | 9.66E-01 | 8.12E-01 |
| Propylene glycol       | 0.427 | 0.743 | 1.501 | -8.78  | 29.98  | 38.51  | 3.79E-01 | 3.44E-01 | 1.26E-01 | 8.20E-01 | 6.25E-01 | 8.12E-01 |
| Pyruvate               | 0.953 | 0.413 | 1.009 | 32.05  | 15.20  | -17.06 | 4.96E-01 | 6.06E-01 | 9.45E-01 | 8.46E-01 | 8.26E-01 | 9.94E-01 |
| sn-G3P                 | 0.418 | 0.458 | 0.454 | 0.69   | 2.66   | 1.97   | 7.60E-01 | 4.90E-01 | 5.56E-01 | 9.27E-01 | 7.23E-01 | 9.26E-01 |
| Succinate + 3HB        | 0.636 | 0.392 | 0.451 | -10.98 | -7.71  | 3.27   | 8.72E-01 | 9.47E-01 | 7.45E-01 | 9.27E-01 | 9.66E-01 | 9.26E-01 |
| Taurine                | 0.456 | 0.251 | 0.599 | -4.89  | -2.41  | 2.48   | 2.83E-01 | 8.48E-01 | 6.31E-01 | 7.00E-01 | 9.66E-01 | 9.26E-01 |
| Tryptophan             | 0.502 | 0.599 | 0.941 | -2.32  | 2.07   | 4.39   | 6.77E-01 | 9.42E-01 | 3.42E-01 | 9.07E-01 | 9.66E-01 | 9.15E-01 |
| Tyrosine               | 1.026 | 1.122 | 0.859 | 2.19   | 11.42  | 9.24   | 7.85E-01 | 3.27E-01 | 3.38E-01 | 9.27E-01 | 6.25E-01 | 9.15E-01 |
| Valine                 | 1.094 | 1.013 | 0.393 | 1.71   | 1.77   | 0.07   | 6.98E-01 | 3.46E-01 | 9.30E-01 | 9.07E-01 | 6.25E-01 | 9.94E-01 |
| Unk_4 (1.074 ppm) (s)  | 0.910 | 0.963 | 0.679 | -1.00  | 13.80  | 14.79  | 8.14E-01 | 4.44E-01 | 5.08E-01 | 9.27E-01 | 6.90E-01 | 9.26E-01 |
| Unk_6 (1.23 ppm) (m)   | 1.045 | 0.944 | 0.821 | -8.02  | -20.20 | -12.23 | 6.45E-01 | 1.65E-01 | 4.60E-01 | 9.07E-01 | 5.03E-01 | 9.15E-01 |
| Unk_10 (2.769 ppm) (s) | 0.772 | 1.246 | 1.463 | -20.16 | -88.36 | -71.38 | 1.86E-01 | 3.20E-02 | 5.63E-02 | 6.30E-01 | 1.85E-01 | 6.62E-01 |
| Unk_11 (2.945 ppm) (s) | 0.177 | 0.150 | 1.035 | -1.75  | 2.43   | 4.18   | 5.98E-01 | 3.66E-01 | 5.99E-01 | 9.07E-01 | 6.34E-01 | 9.26E-01 |
| Unk_12 (3.051 ppm) (s) | 0.464 | 1.026 | 1.346 | -9.42  | 49.01  | 57.76  | 9.46E-01 | 2.50E-01 | 2.21E-01 | 9.82E-01 | 5.41E-01 | 9.15E-01 |
| Unk_13 (3.112 ppm) (s) | 0.650 | 0.535 | 1.389 | -36.94 | -47.80 | -11.36 | 3.43E-01 | 4.10E-01 | 8.70E-01 | 7.75E-01 | 6.66E-01 | 9.63E-01 |
| Unk_14 (3.246 ppm) (s) | 1.147 | 1.503 | 1.474 | -16.78 | -30.70 | -14.11 | 4.03E-02 | 1.25E-02 | 9.08E-02 | 2.40E-01 | 1.08E-01 | 7.87E-01 |
| Unk_15 (3.63 ppm) (s)  | 0.771 | 0.395 | 0.891 | -1.50  | 0.40   | 1.90   | 8.08E-01 | 6.46E-01 | 5.64E-01 | 9.27E-01 | 8.26E-01 | 9.26E-01 |
| Unk_16 (7.334 ppm) (t) | 1.214 | 1.051 | 0.161 | -9.82  | -8.49  | 1.33   | 5.10E-02 | 2.93E-01 | 8.70E-01 | 2.65E-01 | 6.09E-01 | 9.63E-01 |
| Unk_18 (8.238 ppm) (s) | 0.574 | 1.065 | 0.666 | -7.87  | 3.63   | 11.49  | 5.85E-01 | 8.79E-01 | 4.17E-01 | 9.07E-01 | 9.66E-01 | 9.15E-01 |
| Unk_2 (0.914 ppm) (d)  | 1.085 | 1.618 | 1.723 | -27.34 | -68.57 | -43.26 | 3.91E-03 | 2.88E-04 | 1.85E-02 | 6.77E-02 | 7.49E-03 | 4.81E-01 |
| Unk_3 (0.967 ppm) (s)  | 0.757 | 0.932 | 0.431 | -9.86  | -14.41 | -4.57  | 4.37E-01 | 1.17E-01 | 7.38E-01 | 8.31E-01 | 4.36E-01 | 9.26E-01 |
| Unk_7 (1.444 ppm) (d)  | 0.912 | 0.289 | 0.907 | -0.76  | -6.07  | -5.32  | 8.74E-01 | 9.72E-01 | 9.66E-01 | 9.27E-01 | 9.72E-01 | 9.94E-01 |
| Unk_8 (2.050 ppm) (m)  | 1.475 | 1.673 | 0.580 | -20.35 | -24.40 | -4.09  | 2.30E-03 | 3.31E-03 | 7.69E-01 | 5.98E-02 | 4.30E-02 | 9.26E-01 |
| Unk_9 (2.743 ppm) (s)  | 0.940 | 1.067 | 0.405 | -13.92 | -21.06 | -7.19  | 1.96E-01 | 5.14E-02 | 8.01E-01 | 6.30E-01 | 2.43E-01 | 9.26E-01 |

Grey – Metabolites above VIP 1.00,  $p$  value <0.05, adjusted  $p$  value <0.05

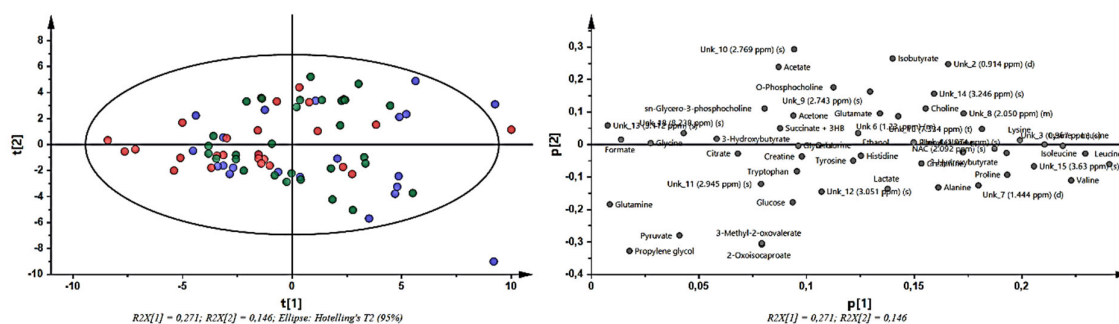

**Figure S4.** PCA model plot and corresponding loading plot for the RA, AS and PsA groups of patients before treatment. Red – RA before treatment Green – AS before treatment, Blue – PsA before treatment.

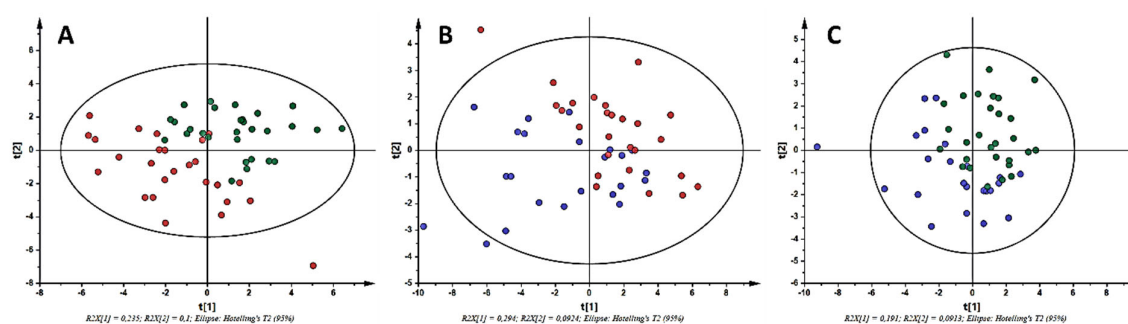

**Figure S5.** PCA model plot and corresponding loading plot for the RA, AS and PsA groups of patients before treatment. A – RA vs. AS, B – RA vs. PsA, C – AS vs. PsA. Red – RA before treatment Green – AS before treatment, Blue – PsA before treatment.



**Figure S6.** The MetPA analysis within the most perturbed biochemical pathways in: a) RA, b) AS, c) PsA

a)

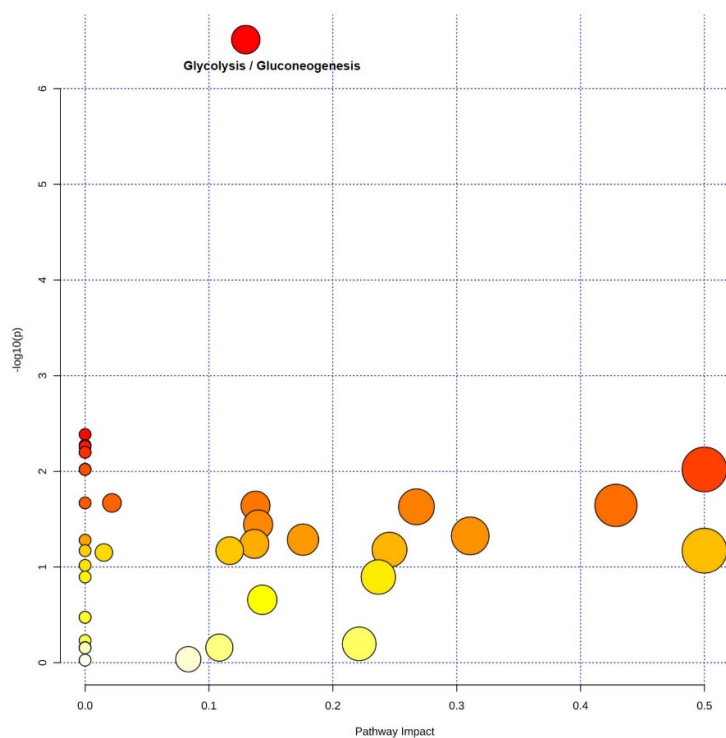

b)

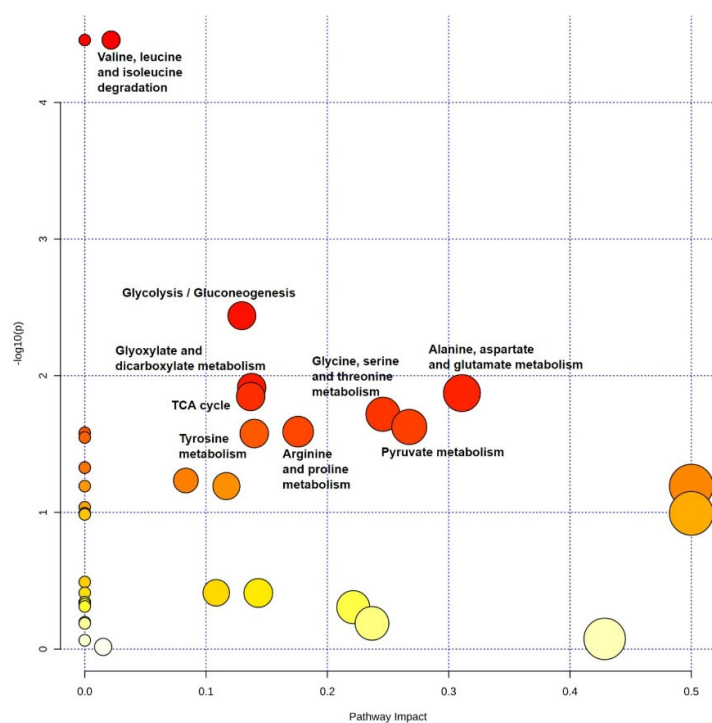

c)

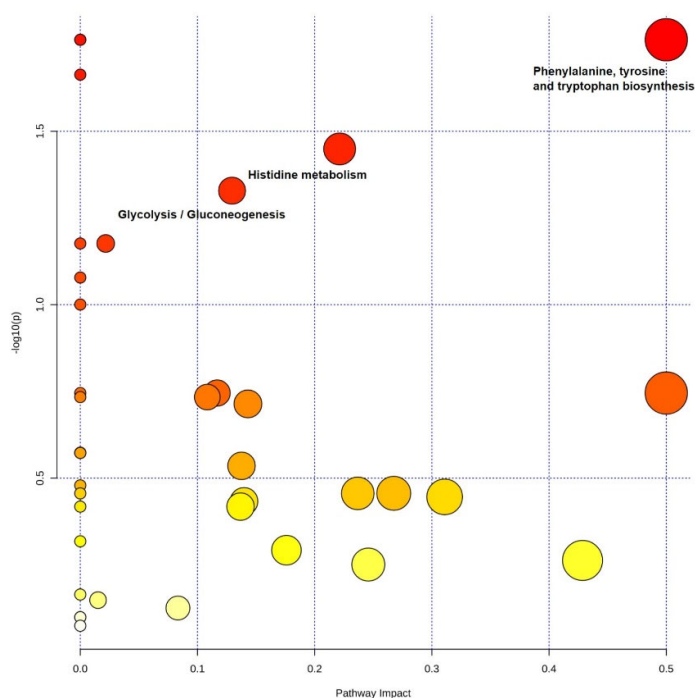

**Table S5.** List of assignments of  $^1\text{H}$  NMR resonance signals with chemical shift, KEGG and HMDB ID. Presented in alphabetical order list of compounds spin systems that were used in multivariate and univariate analysis.

| Name                   | Chemical shift [ppm]       | Multiplicity       | HMDB ID   | KEGG ID |
|------------------------|----------------------------|--------------------|-----------|---------|
| 2-Oxoisocaproate       | 0.924; 2.623               | (d), (d)           | HMDB00695 | C00233  |
| 2-Hydroxybutyrate      | 0.904                      | (s)                | HMDB00008 | C05984  |
| 3-Hydroxybutyrate      | 1.207; 2.324               | (d), (dd)          | HMDB00357 | C01089  |
| 3-Methyl-2-oxovalerate | 1.101                      | (d)                | HMDB00491 | C03465  |
| Acetate                | 1.932                      | (s)                | HMDB00042 | C00033  |
| Acetone                | 2.248                      | (s)                | HMDB01659 | C00207  |
| Alanine                | 1.492                      | (d)                | HMDB00161 | C00041  |
| Choline                | 3.199                      | (s)                | HMDB00097 | C00114  |
| Citrate                | 2.557                      | (dd)               | HMDB00094 | C00158  |
| Creatine               | 3.046; 3.942               | (s); (s)           | HMDB00064 | C00300  |
| Creatinine             | 3.061; 4.076               | (s); (s)           | HMDB00562 | C00791  |
| Ethanol                | 1.189                      | (t)                | HMDB00108 | C00469  |
| Formate                | 8.464                      | (s)                | HMDB00142 | C00058  |
| Glycine                | 3.582                      | (s)                | HMDB00123 | C00037  |
| Glucose                | 3.275; 3.522; 3.895; 5.263 | (m); (m); (d); (d) | HMDB00122 | C00031  |
| Glutamate              | 2.349                      | (m)                | HMDB00148 | C00025  |
| Glutamine              | 2.152; 2.45                | (m); (m)           | HMDB00641 | C00064  |
| Glycerol               | 3.588                      | (m)                | HMDB00131 | C00116  |
| Isobutyrate            | 1.078                      | (s)                | HMDB01873 | C02632  |
| Isoleucine             | 0.998                      | (d)                | HMDB00172 | C00407  |

|                                    |              |          |           |        |
|------------------------------------|--------------|----------|-----------|--------|
| <b>Lactate</b>                     | 1.338; 4.133 | (d); (q) | HMDB00190 | C00186 |
| <b>Leucine</b>                     | 0.951        | (t)      | HMDB00687 | C00123 |
| <b>Lysine + Leucine</b>            | 1.737        | (m)      | -         | -      |
| <b>Lysine</b>                      | 1.92; 3.033  | (m); (t) | HMDB00182 | C00047 |
| <b>NAC</b>                         | 2.092        | (s)      | -         | -      |
| <b>O-Phosphocholine</b>            | 3.211        | (s)      | HMDB00284 | C00588 |
| <b>Histidine</b>                   | 8.178        | (s)      | HMDB00177 | C00135 |
| <b>Phenylealanine</b>              | 7.437        | (m)      | HMDB00159 | C00079 |
| <b>Proline</b>                     | 2.017        | (m)      | HMDB00162 | C00148 |
| <b>Propylene glycol</b>            | 1.128        | (d)      | HMDB01881 | C02912 |
| <b>Pyruvate</b>                    | 2.391        | (s)      | HMDB00243 | C00022 |
| <b>sn-Glycero-3-phosphocholine</b> | 3.235        | (s)      | HMDB00086 | C00670 |
| <b>Succinate + 3HB</b>             | 2.409        | (s)      | -         | -      |
| <b>Taurine</b>                     | 3.296        | (s)      | HMDB00251 | C00245 |
| <b>Tryptophan</b>                  | 7.562        | (d)      | HMDB00883 | C00183 |
| <b>Tyrosine</b>                    | 6.925        | (m)      | HMDB00158 | C00082 |
| <b>Valine</b>                      | 0.977        | (d)      |           |        |
| <b>Unk_2</b>                       | 0.914        | (d)      | -         | -      |
| <b>Unk_3</b>                       | 0.967        | (s)      | -         | -      |
| <b>Unk_4</b>                       | 1.074        | (s)      | -         | -      |
| <b>Unk_6</b>                       | 1.23         | (m)      | -         | -      |
| <b>Unk_7</b>                       | 1.444        | (d)      | -         | -      |
| <b>Unk_8</b>                       | 2.05         | (m)      | -         | -      |
| <b>Unk_9</b>                       | 2.743        | (s)      | -         | -      |
| <b>Unk_10</b>                      | 2.769        | (s)      | -         | -      |
| <b>Unk_11</b>                      | 2.945        | (s)      | -         | -      |
| <b>Unk_12</b>                      | 3.051        | (s)      | -         | -      |
| <b>Unk_13</b>                      | 3.112        | (s)      | -         | -      |
| <b>Unk_14</b>                      | 3.246        | (s)      | -         | -      |
| <b>Unk_15</b>                      | 3.63         | (s)      | -         | -      |
| <b>Unk_16</b>                      | 7.334        | (t)      | -         | -      |
| <b>Unk_18</b>                      | 8.238        | (s)      | -         | -      |
